# Supplementary material for: Synthesis, enzyme inhibition assay, and molecular modeling study of novel pyrazolines linked to 4-methylsulfonylphenyl scaffold: antitumor activity and cell cycle analysis
Source: Royal Society of Chemistry journal article supplement (doi:10.1039/d4ra03902e), 2024-01-01

**Synthesis, enzyme inhibition assay, and molecular modeling study of  
novel pyrazolines linked to 4-methylsulfonylphenyl scaffold:  
Antitumor activity and cell cycle analysis**

Alaa A.-M. Abdel-Aziz, Adel S. El-Azab, Simone Brogi, , Rezk R. Ayyad\*, Hamad M. Alkahtani,

Hatem A. Abuelizz, Ibrahim A. Al-Suwaidan, Abdulrahman M. Al-Obaid

## **NMR Figures**

drmoenes-HN-126.10.fid — PROTON CDCl3 D:\ abari 20

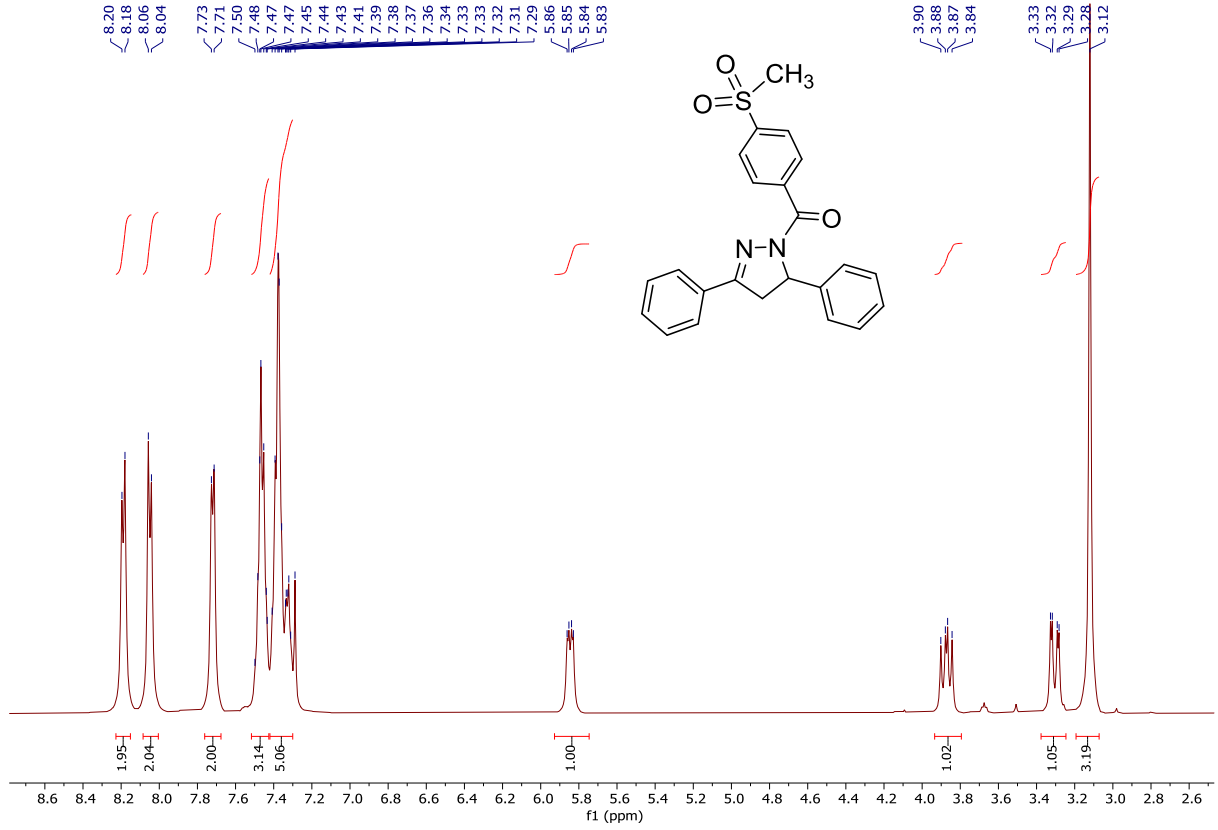

drmoenes-HN-126.11.fid — C13CPD CDCl3 D:\ abari 20

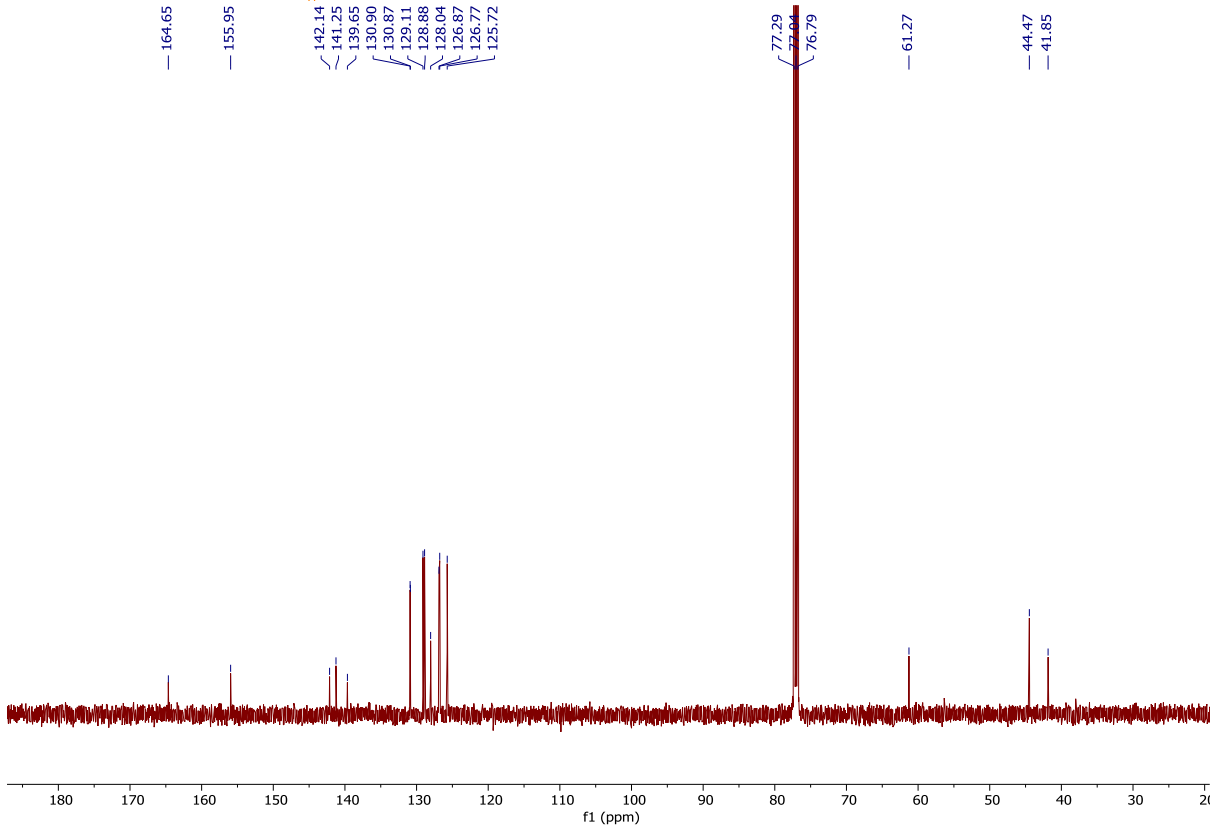

drMoenis-117.10.fid — PROTON DMSO (C:\Bruker\TOPSPIN) abari 34

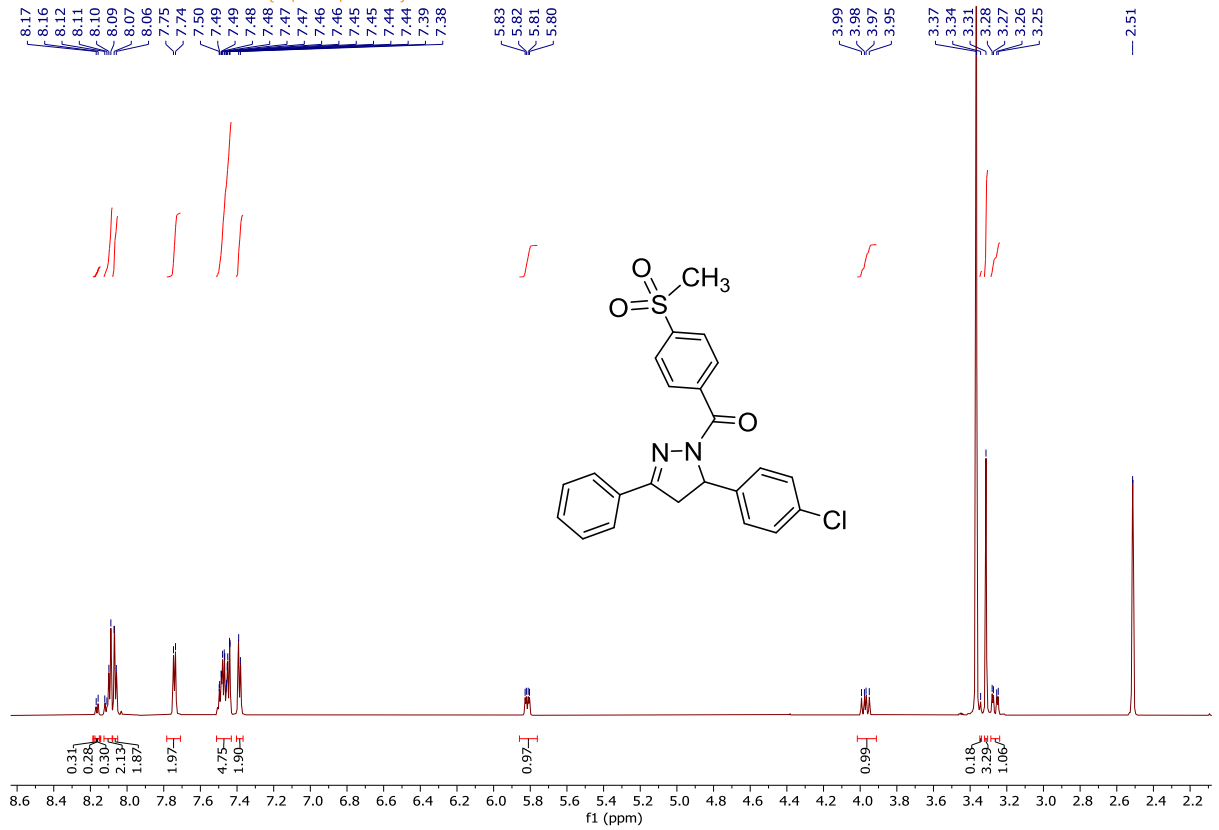

drMoenis-117.11.fid — C13CPD DMSO (C:\Bruker\TOPSPIN) abari 34

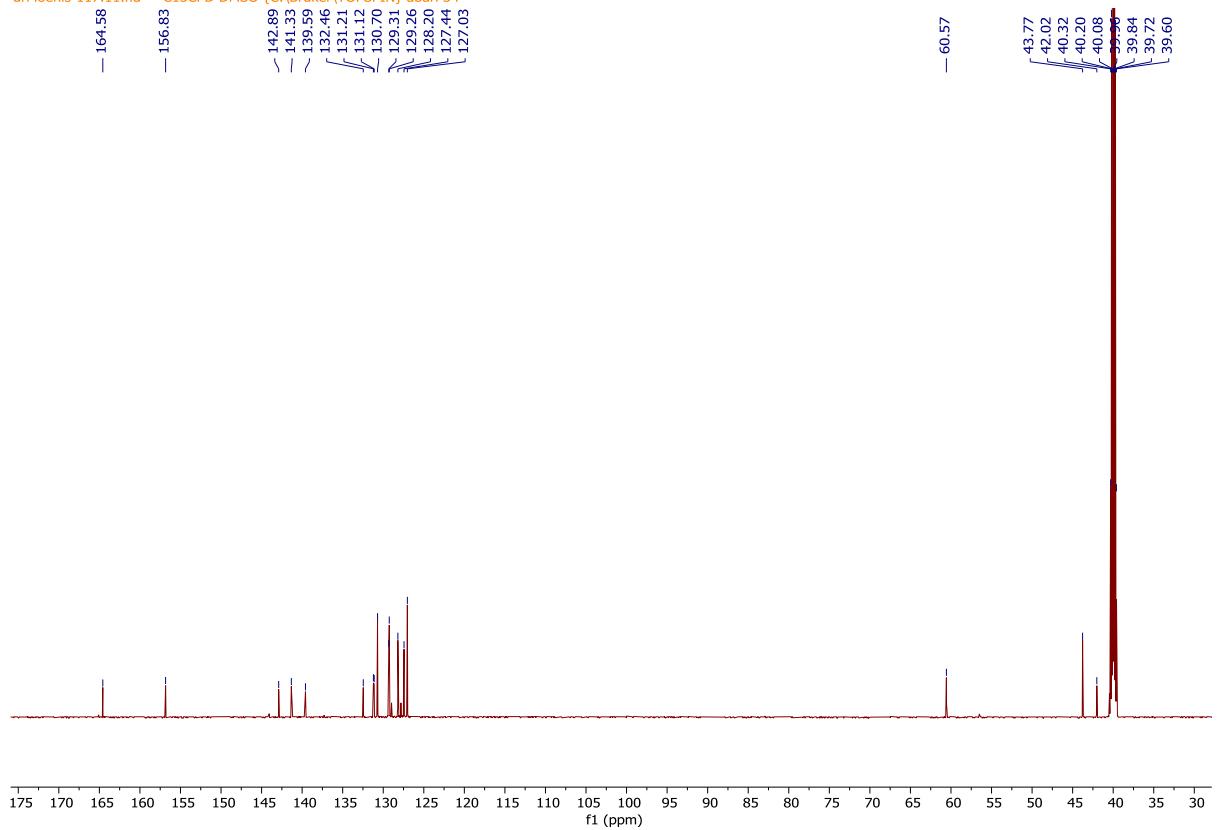

drMoenis-111.10.fid — PROTON DMSO {C:\Bruker\TOPSPIN} abari 26

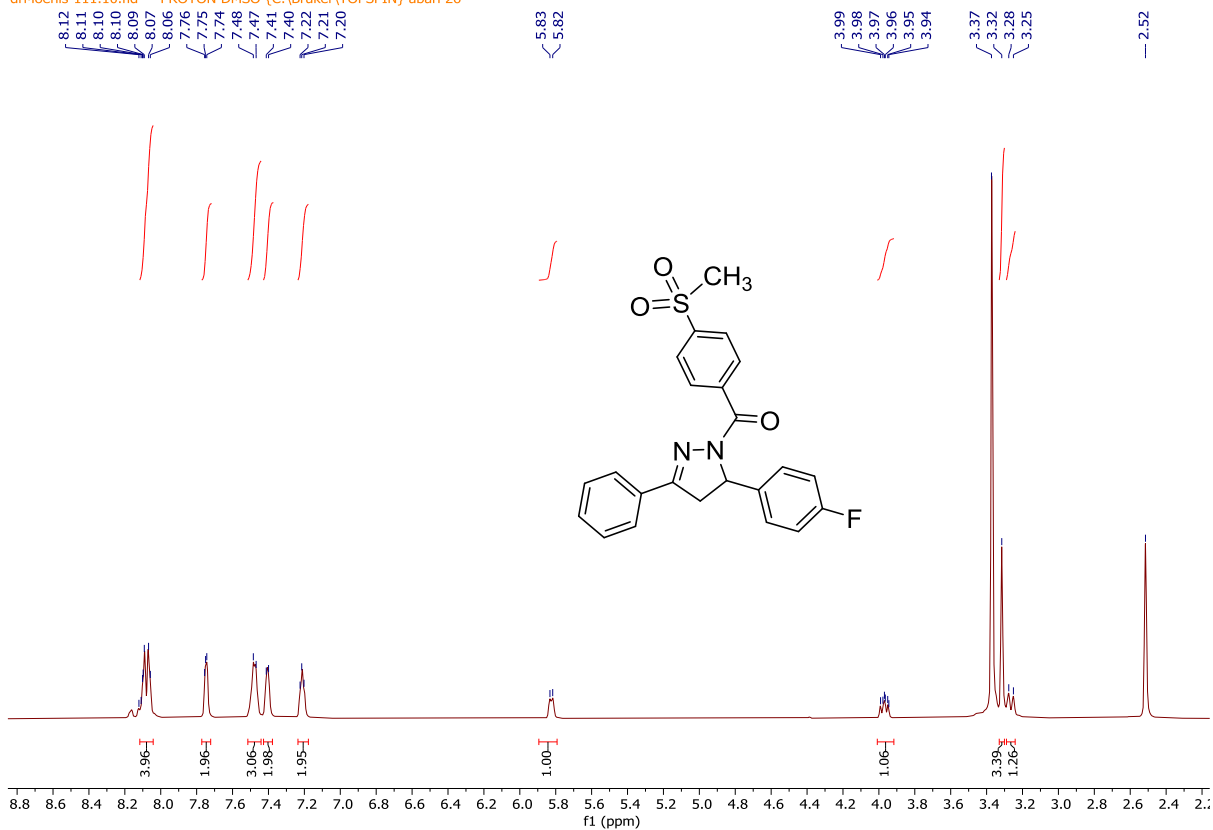

drMoenis-111.11.fid — C13CPD DMSO {C:\Bruker\TOPSPIN} abari 26

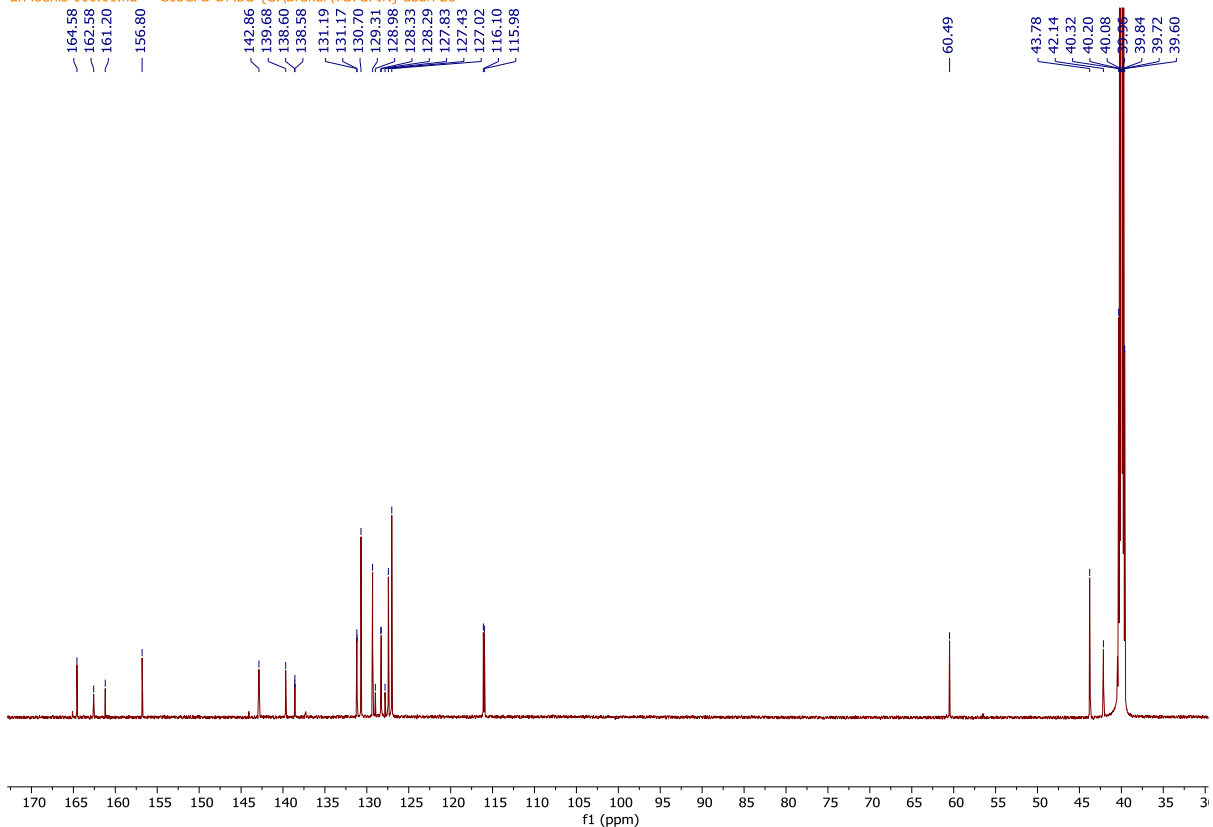

drmoenes-HN-127.10.fid — PROTON CDCl3 D:\ abari 21

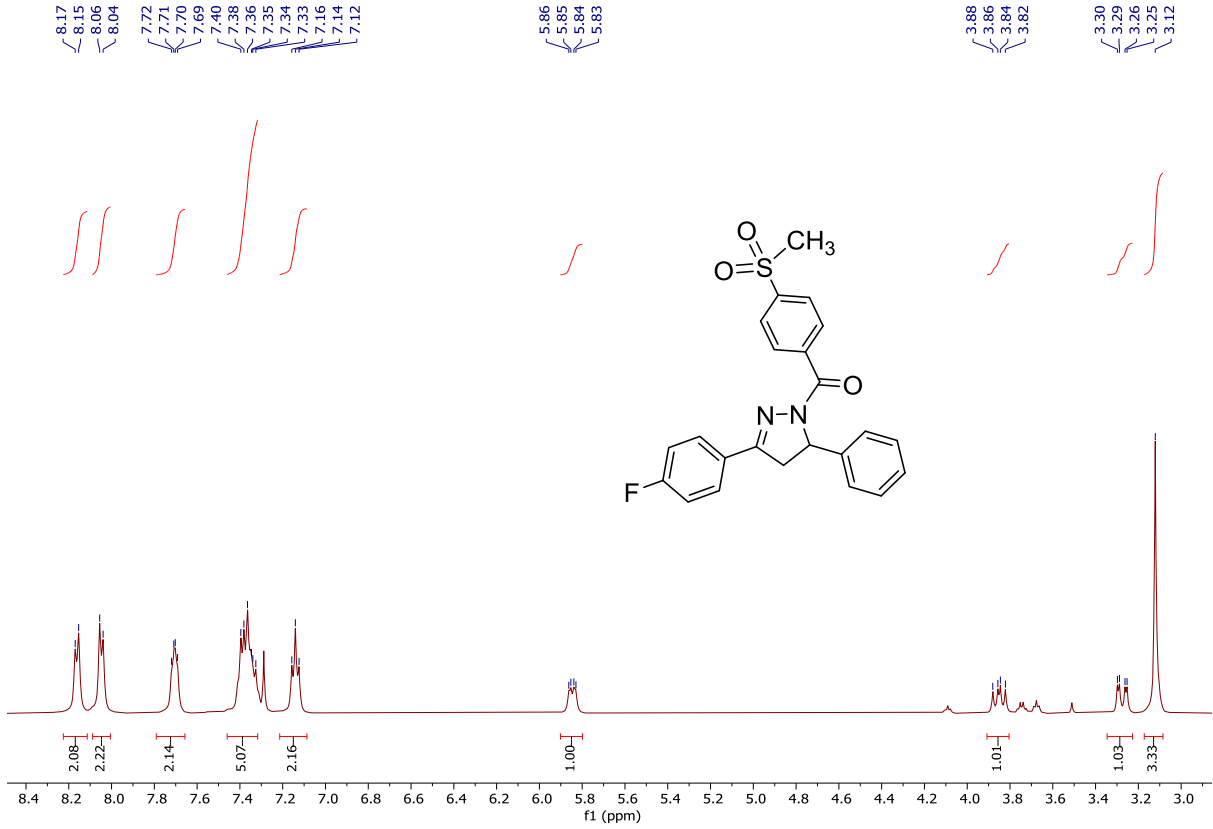

drmoenes-HN-127.11.fid — C13CPD CDCl3 D:\ abari 21

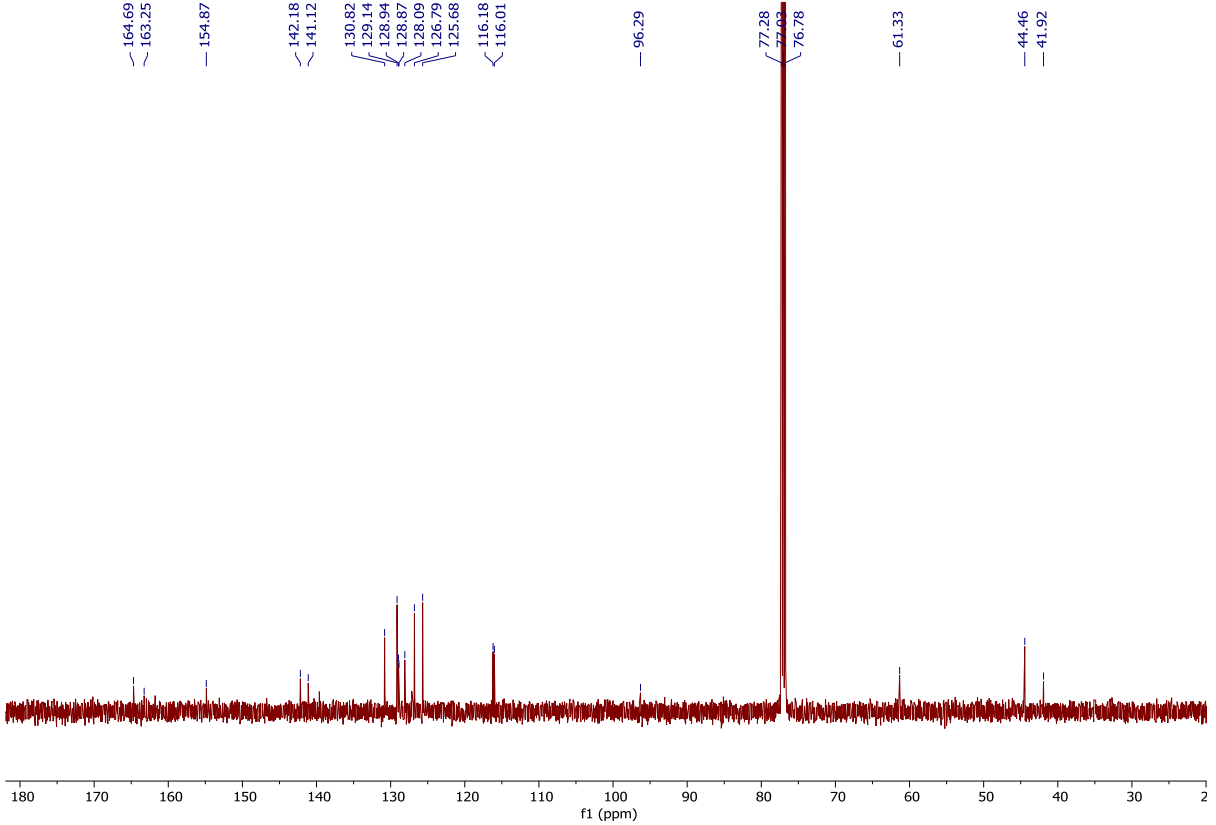

drMoenis-291.10.fid — PROTON DMSO C:\Bruker\TOPSPIN abari 40

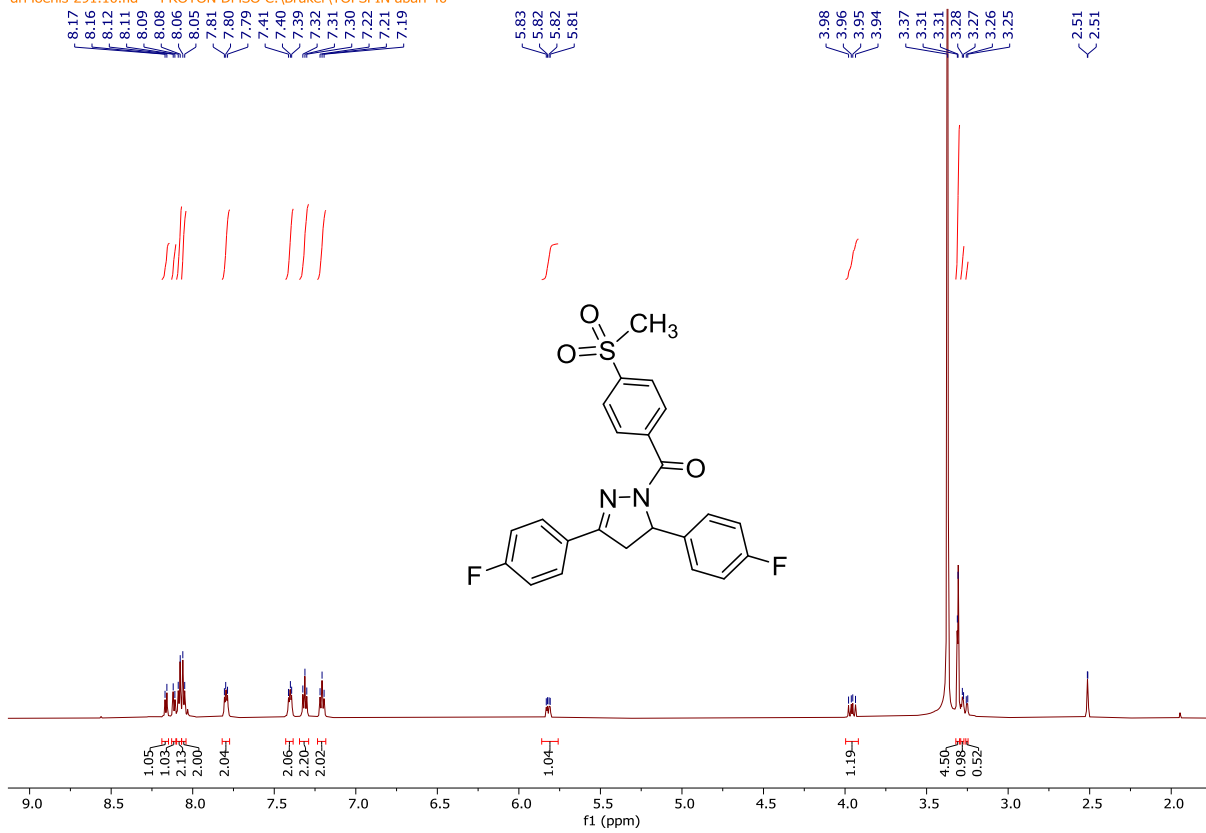

drMoenis-291.11.fid — C13CPD DMSO C:\Bruker\TOPSPIN abari 40

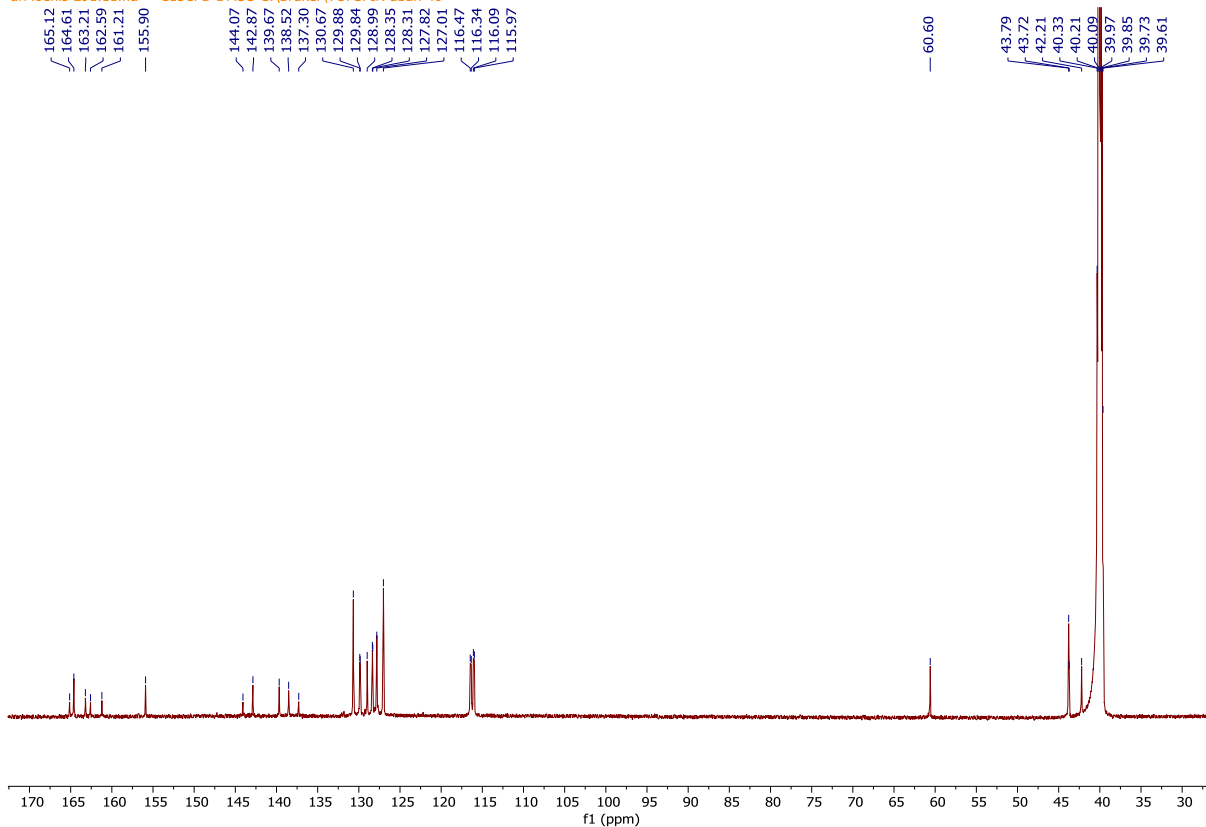

drMoenis-287.10.fid — PROTON DMSO C:\Bruker\TOPSPIN abari 38

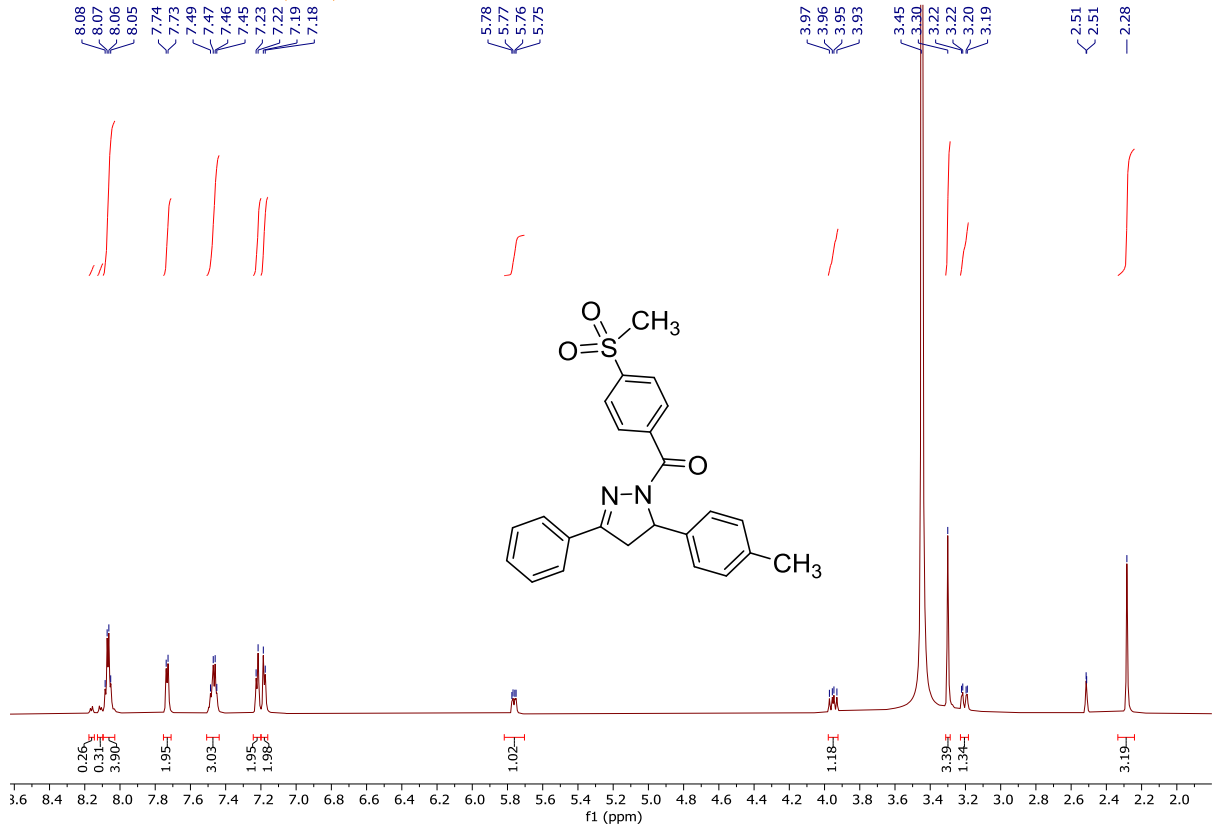

drMoenis-287.11.fid — C13CPD DMSO C:\Bruker\TOPSPIN abari 38

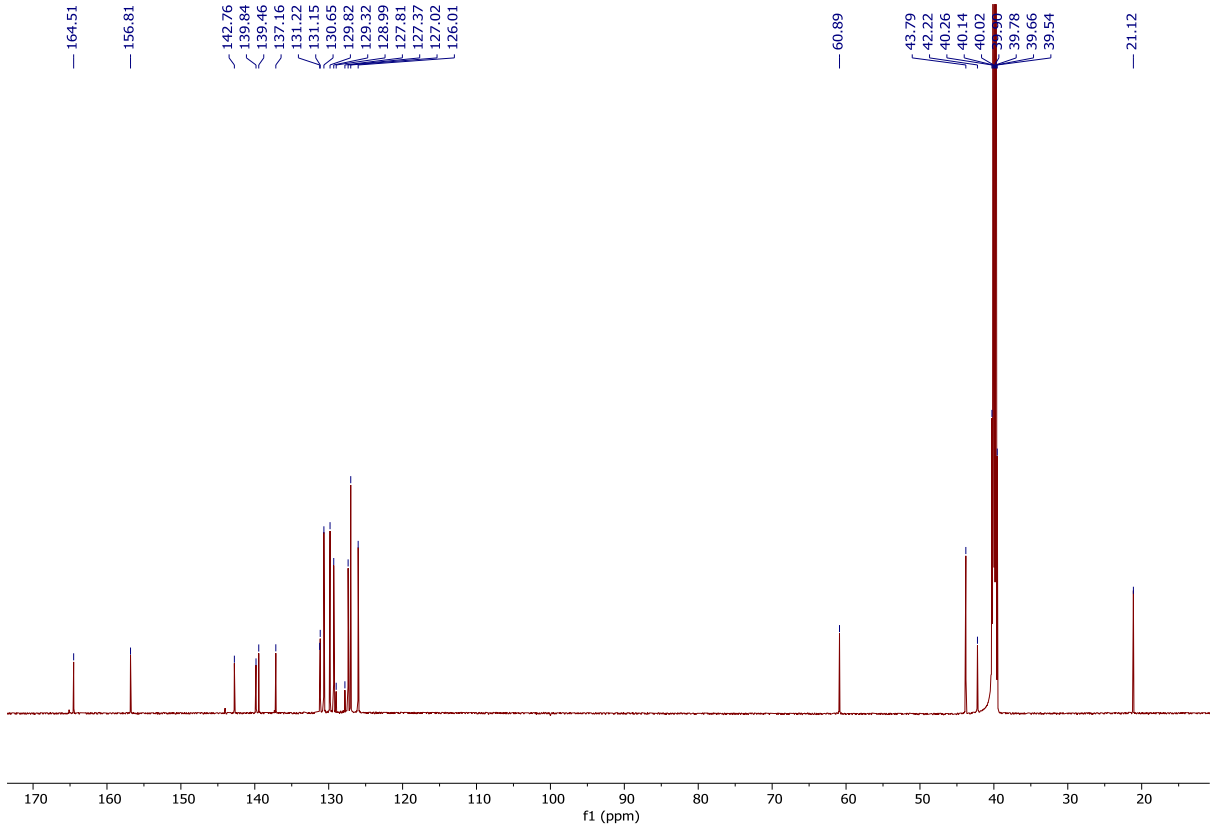

drmoenes-HN-125.10.fid — PROTON CDCI3 D:\\ abari 5

8.19 8.18 8.05 8.03 7.61 7.60 7.26 7.24 7.19 7.18 5.81 5.80 5.78 5.77 3.85 3.83 3.82 3.79 3.29 3.28 3.25 3.24 3.12 2.42 2.35

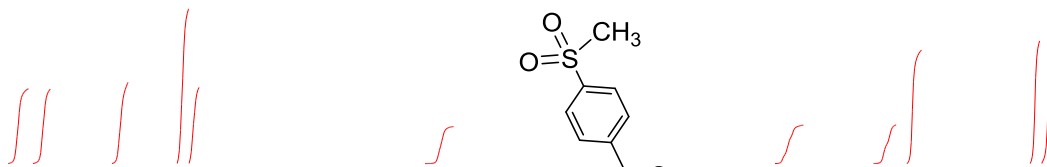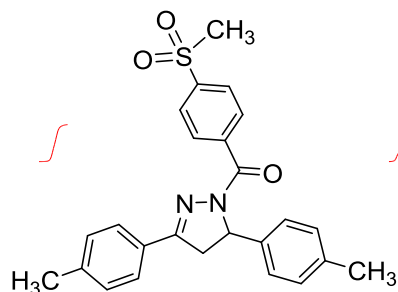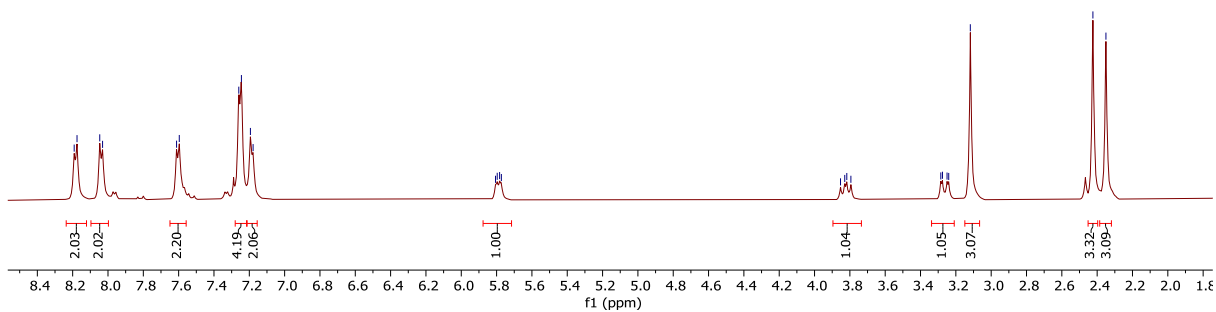

drmoenes-HN-125.11.fid — C13CPD CDCI3 D:\\ abari 5

164.45 156.06 142.01 141.29 139.82 138.44 137.72 130.92 129.72 129.56 129.31 128.16 126.83 126.72 125.70 77.30 77.05 76.79 61.01 44.47 41.87 21.56 21.14

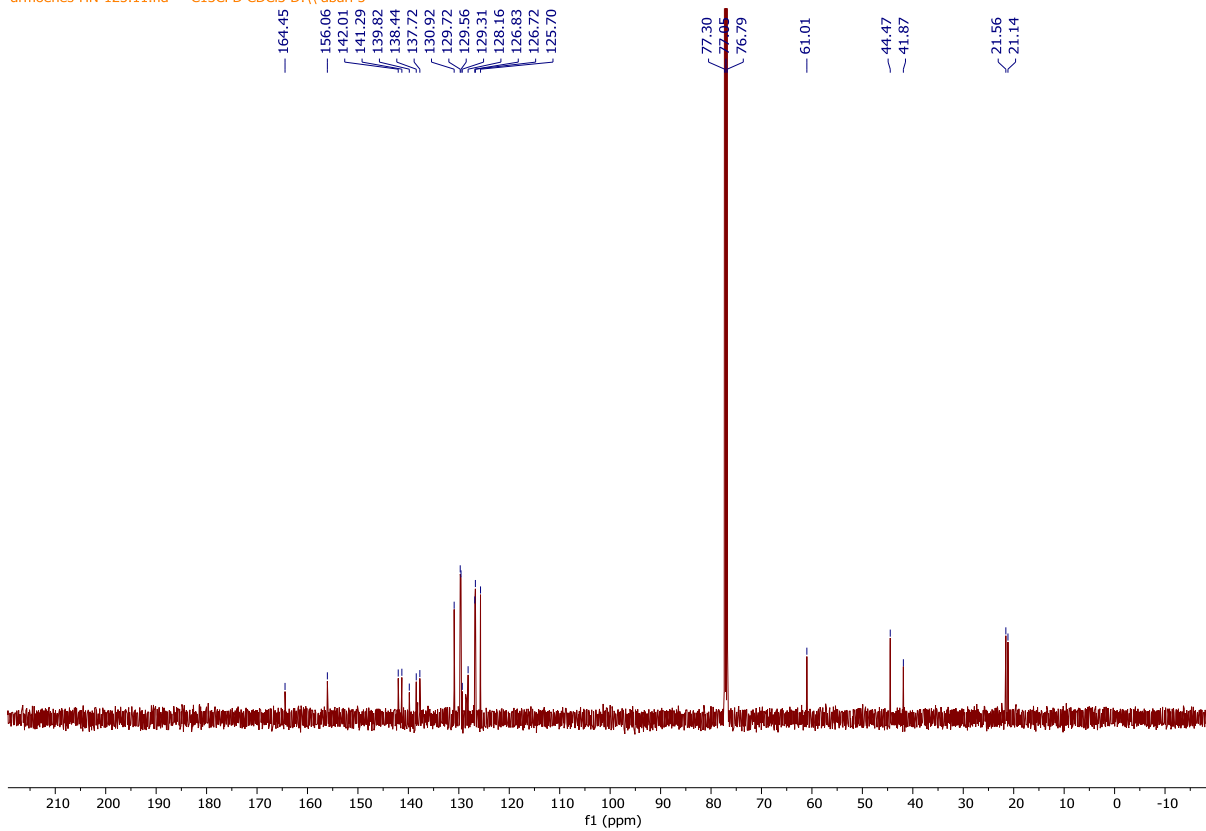



drmoenes-MS-24.10.fid — PROTON DMSO {C:\Bruker\TOPSPIN} abari 52

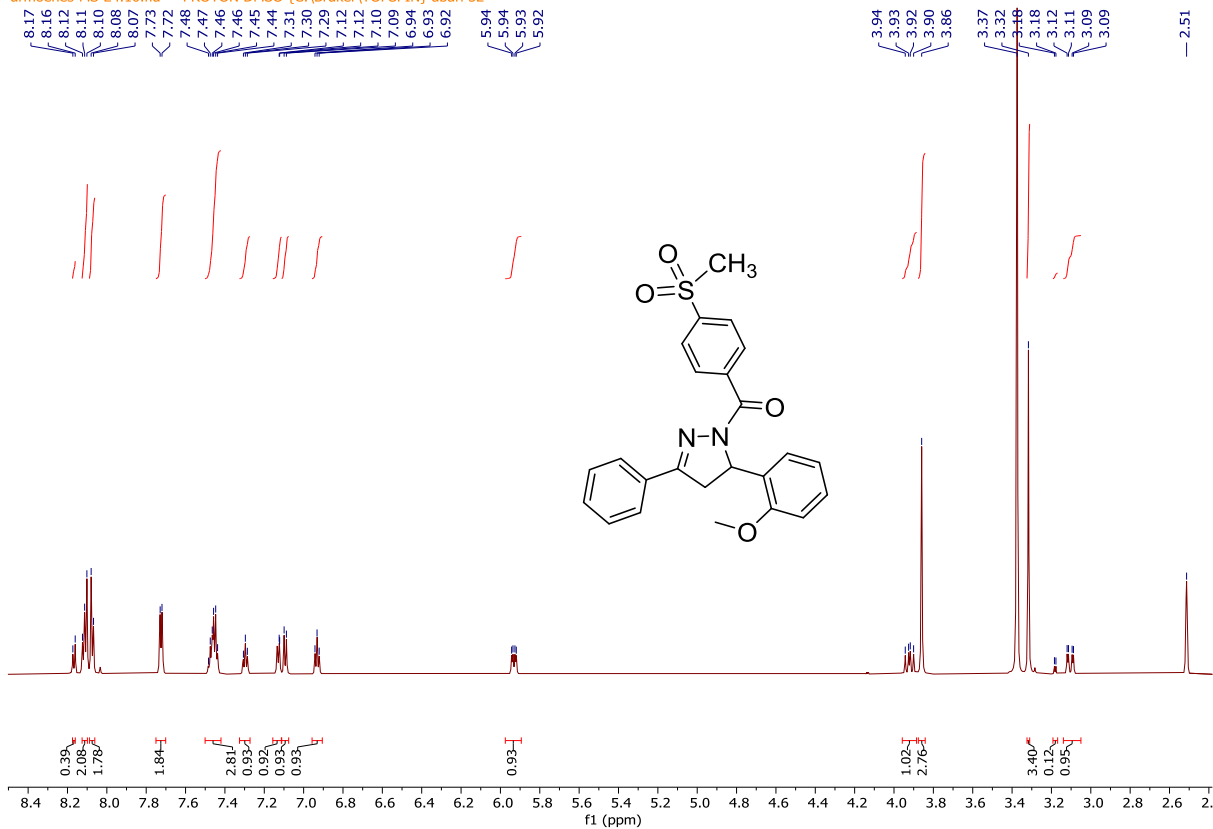

drmoenes-MS-24.11.fid — C13CPD DMSO {C:\Bruker\TOPSPIN} abari 52

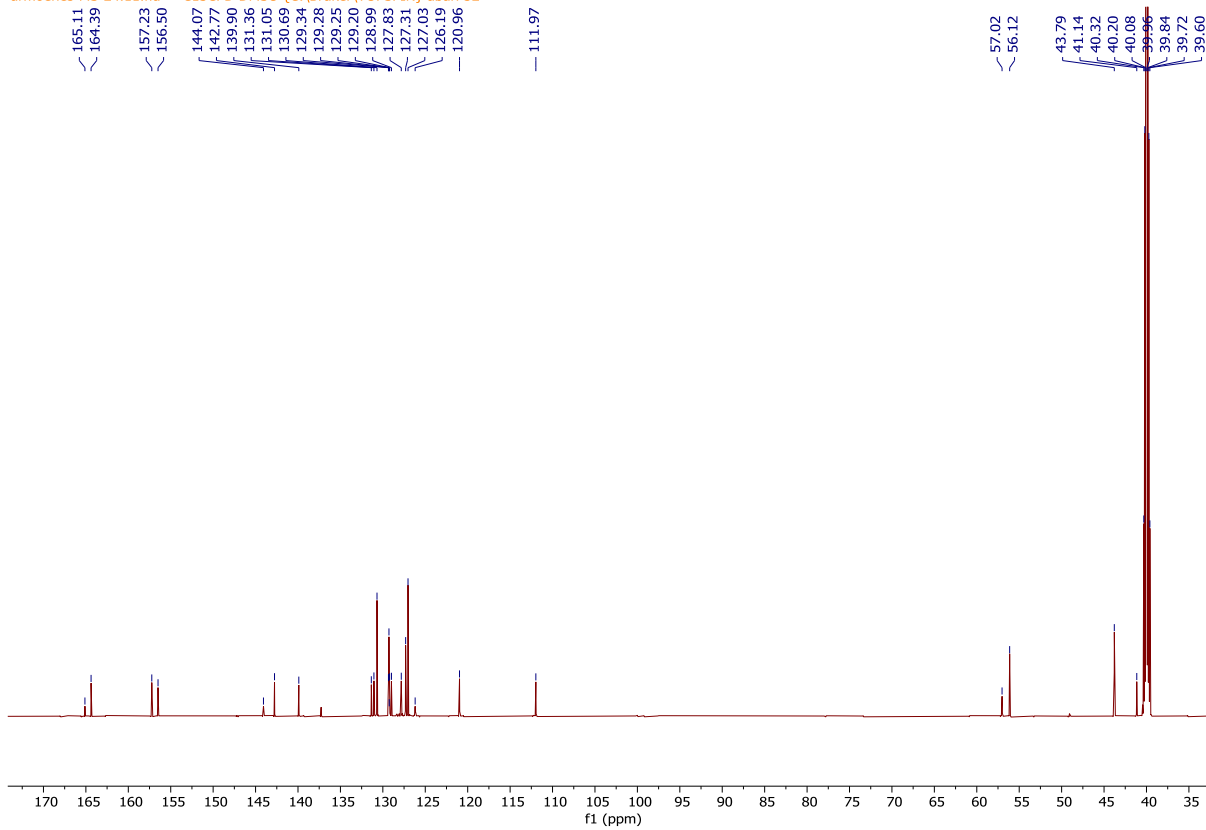

drMoenis-292.10.fid — PROTON DMSO C:\Bruker\TOPSPIN abari 41

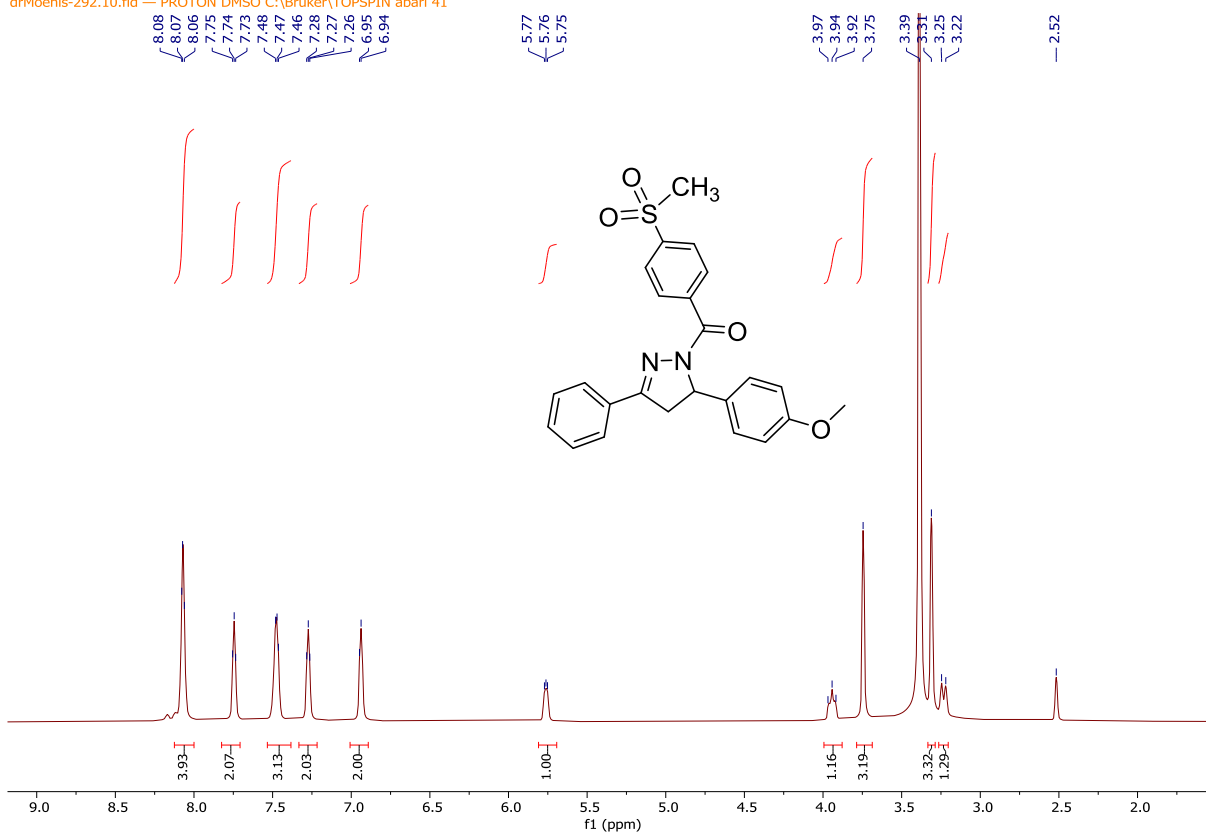

drMoenis-292.11.fid — C13CPD DMSO C:\Bruker\TOPSPIN abari 41

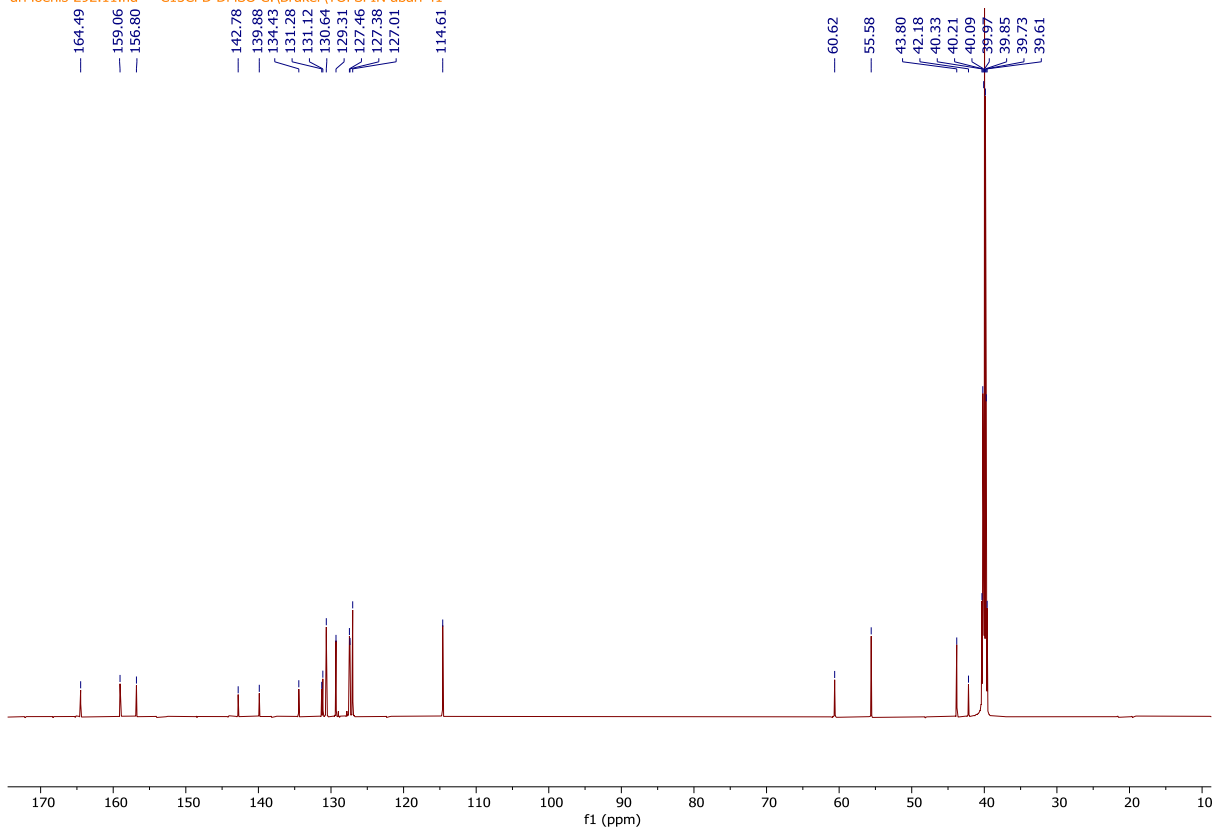

drMoenis-114.10.fid — PROTON DMSO (C:\Bruker\TOPSPIN) abari 29

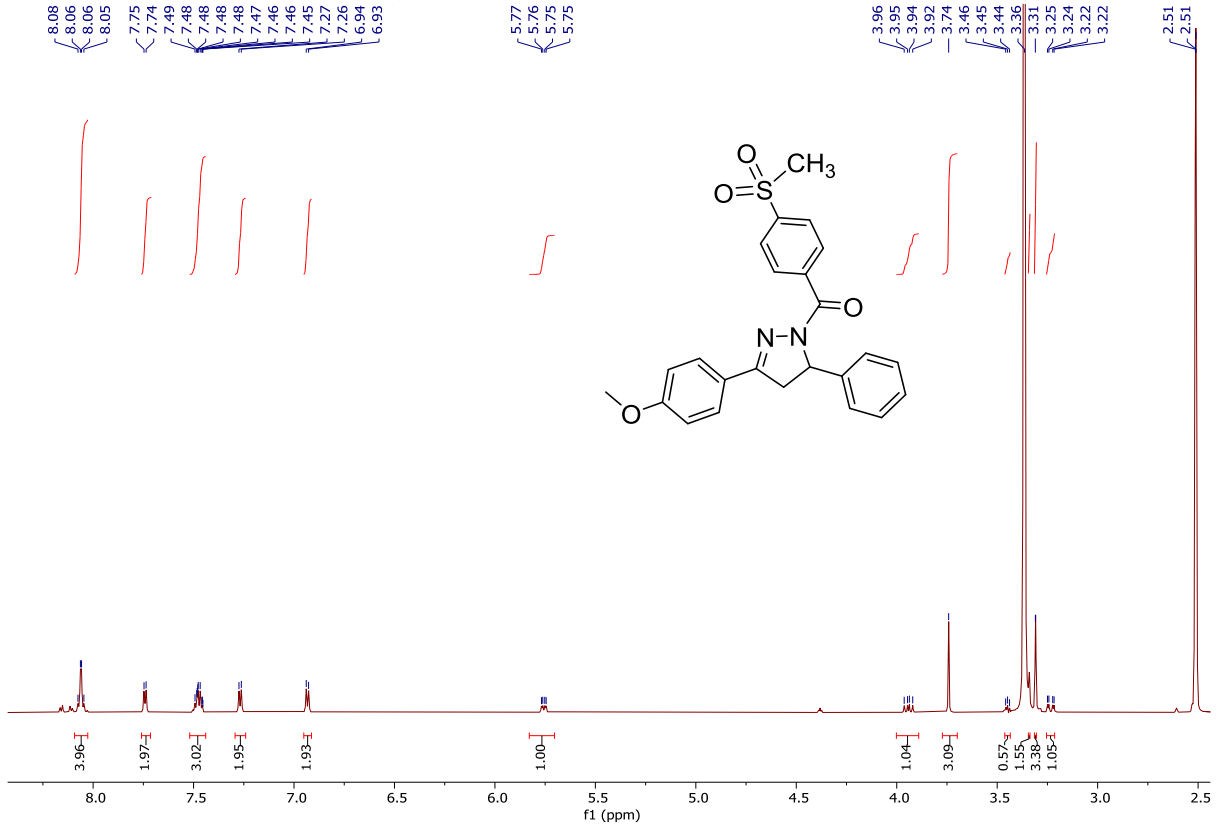

drMoenis-114.11.fid — C13CPD DMSO (C:\Bruker\TOPSPIN) abari 29

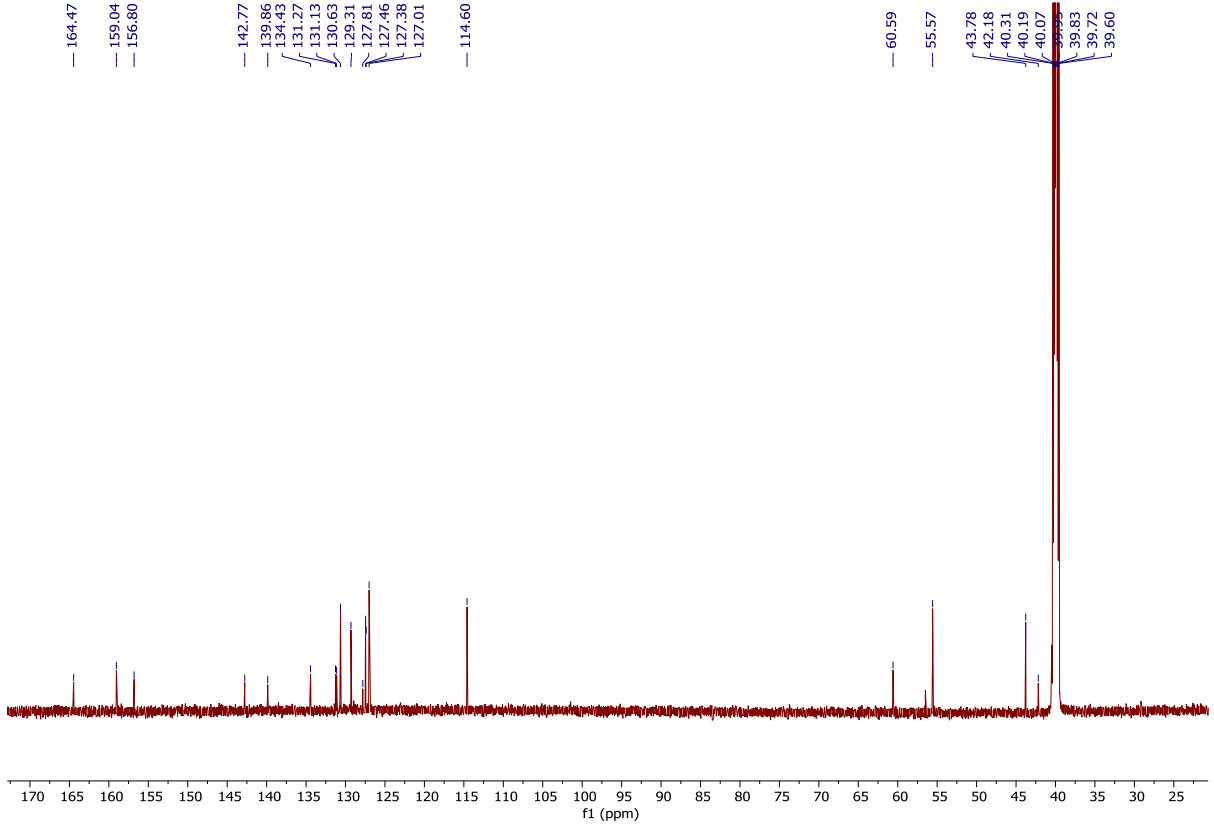

drmoenes-HN-121.10.fid — PROTON CDCl3 D:\ abari 1

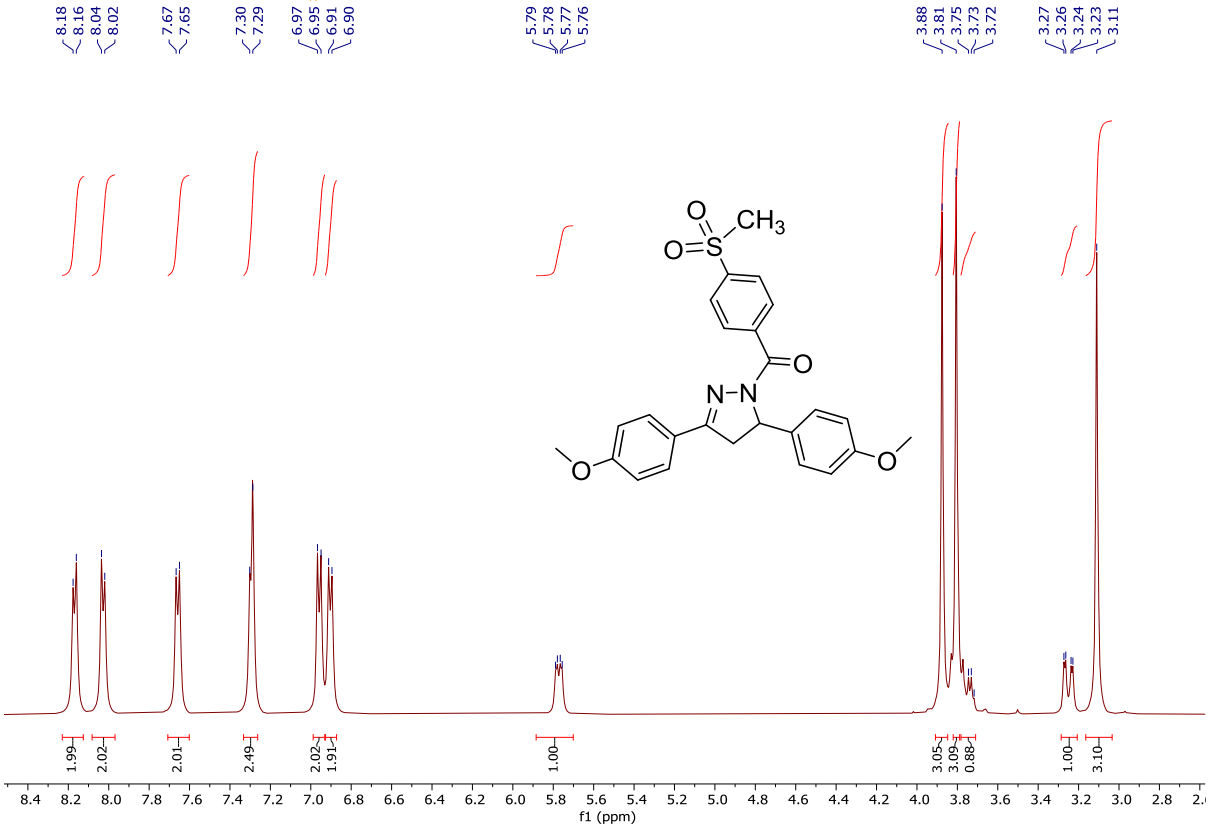

drmoenes-HN-121.11.fid — C13CPD CDCl3 D:\ abari 1

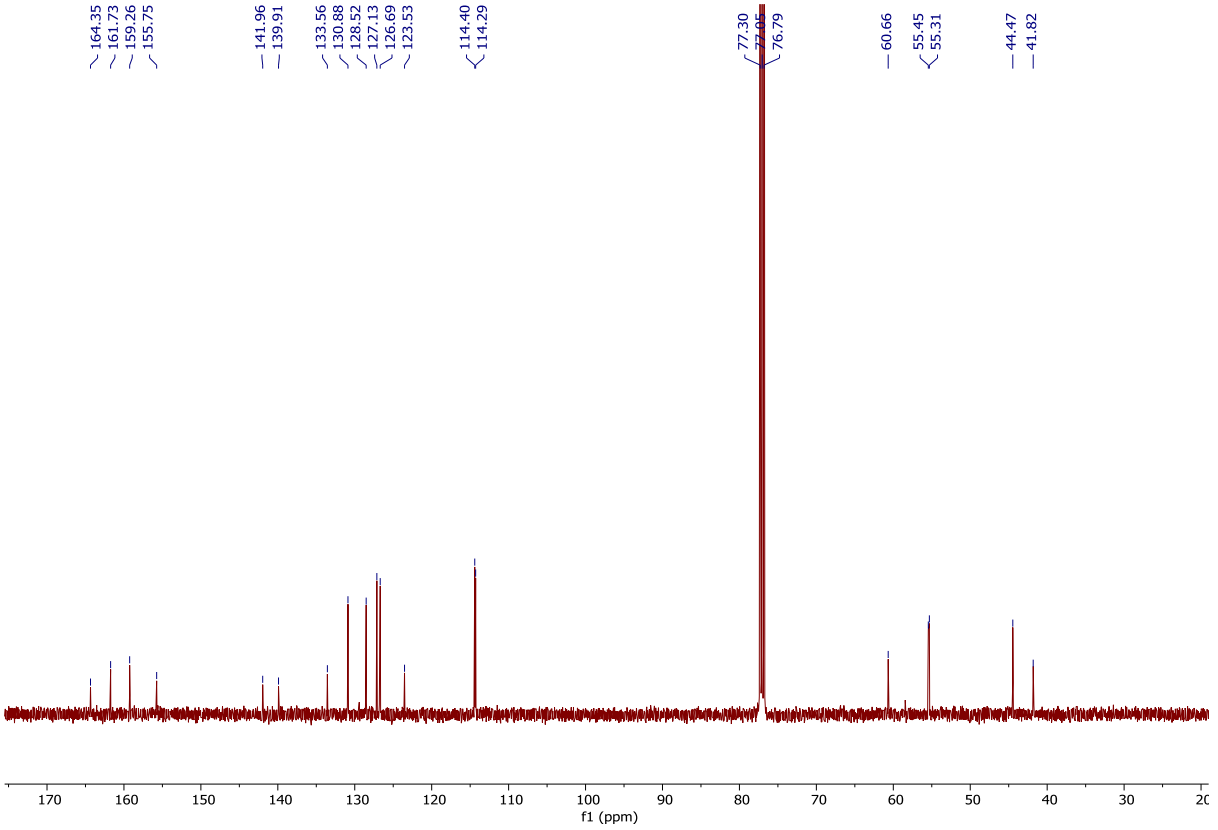

drMoenis-M5-85.11.fid — C13CPD DMSO (C:\Bruker\TOPSPIN) abari 56

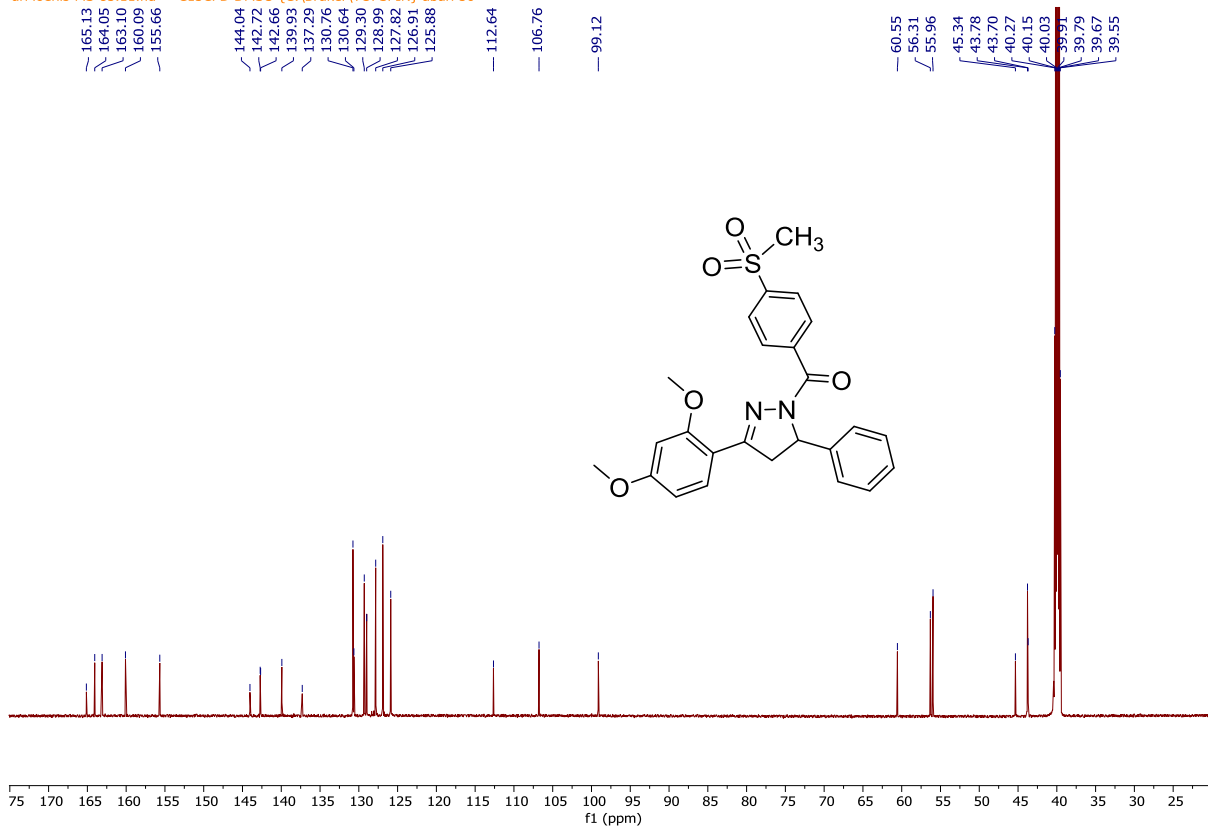

drmoenes-HN-124.10.fid — PROTON CDCI3 D:\\ abari 4

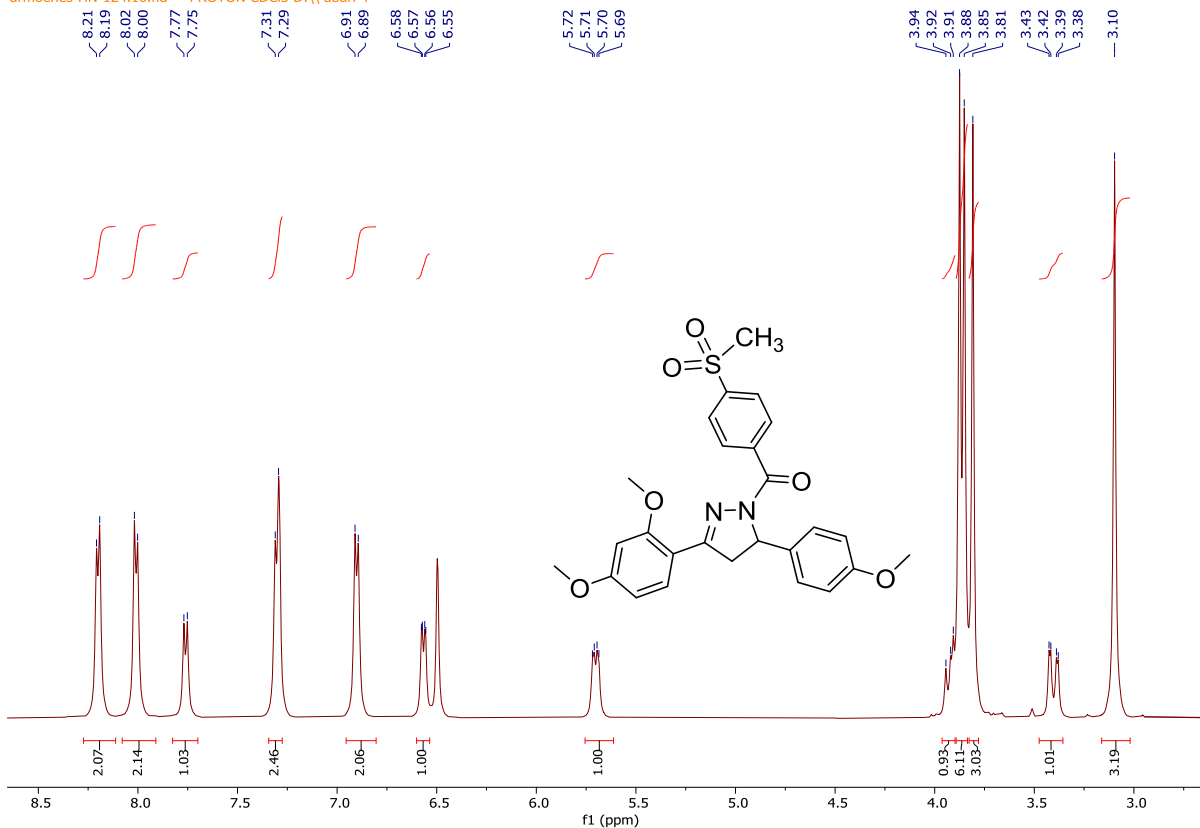

drmoenes-HN-124.11.fid — C13CPD CDCI3 D:\\ abari 4

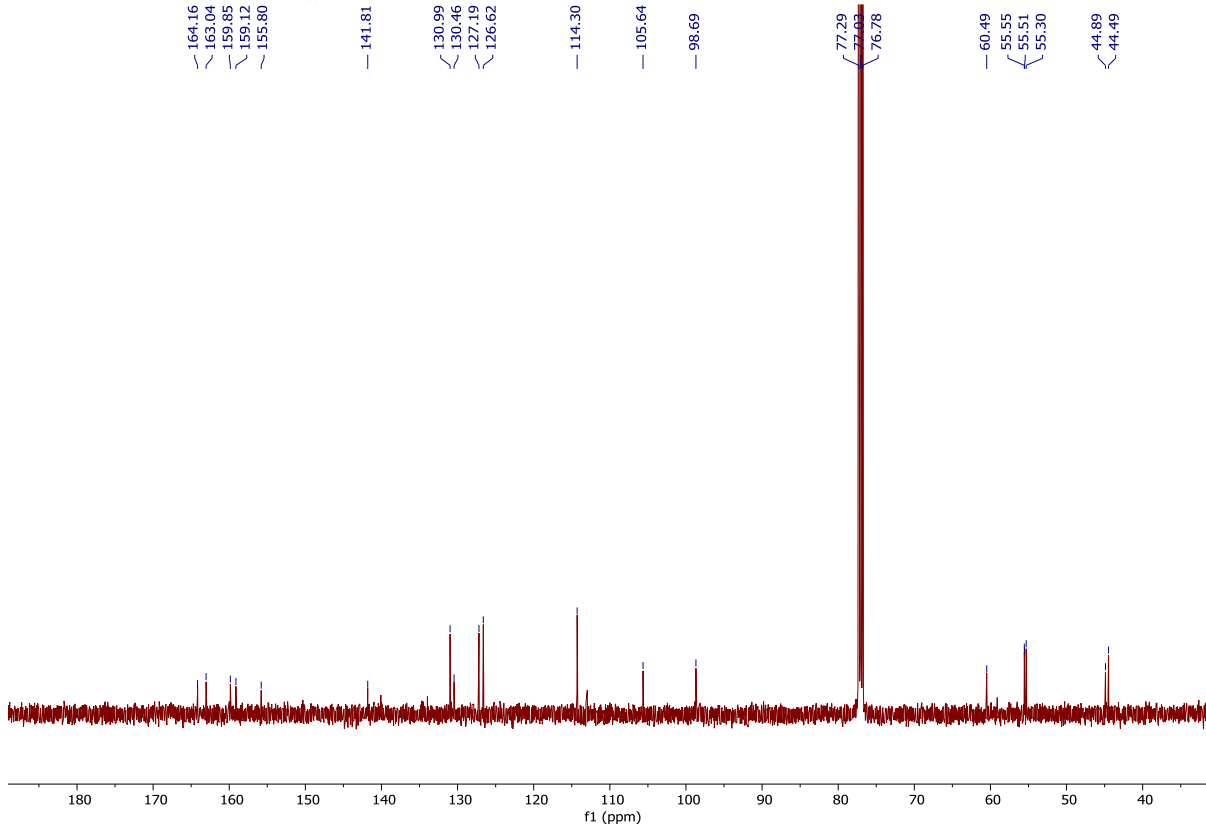

drMoenis-285.10.fid — PROTON DMSO C:\Bruker\TOPSPIN abari 37

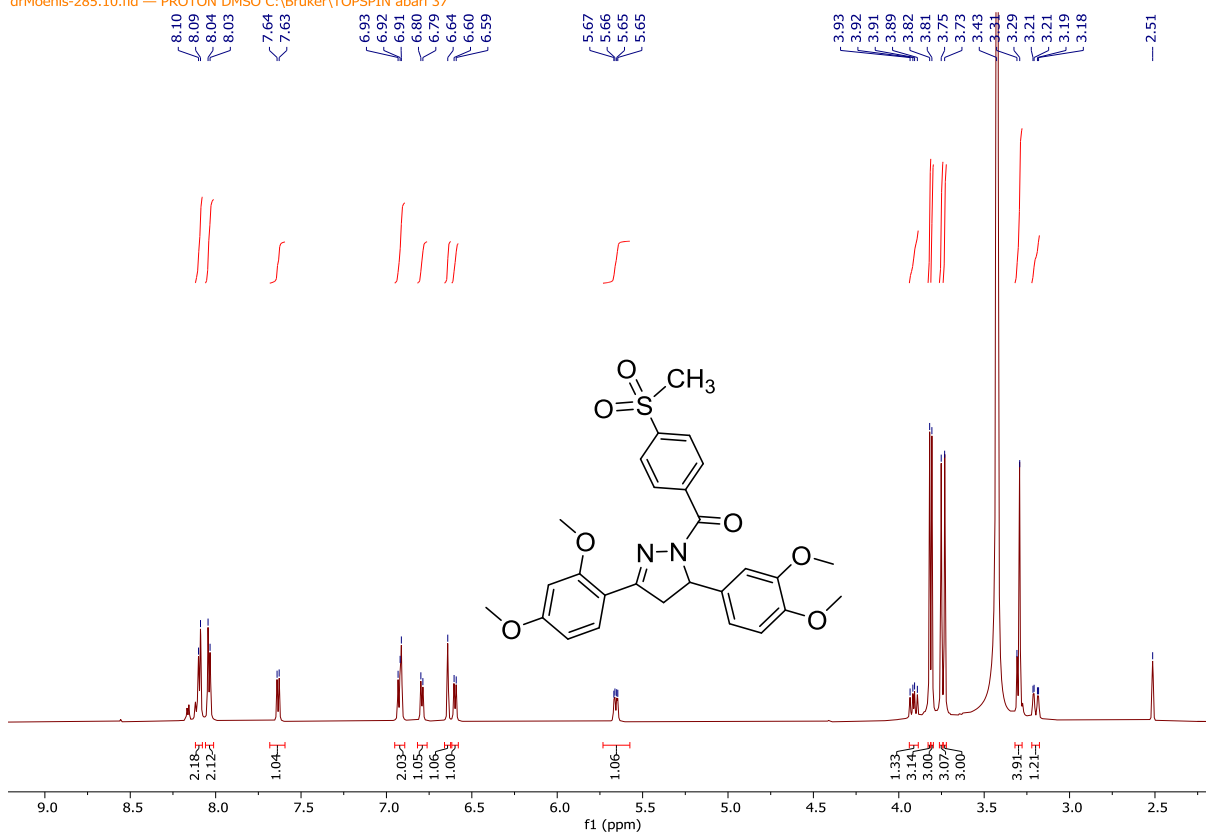

drMoenis-285.11.fid — C13CPD DMSO C:\Bruker\TOPSPIN abari 37

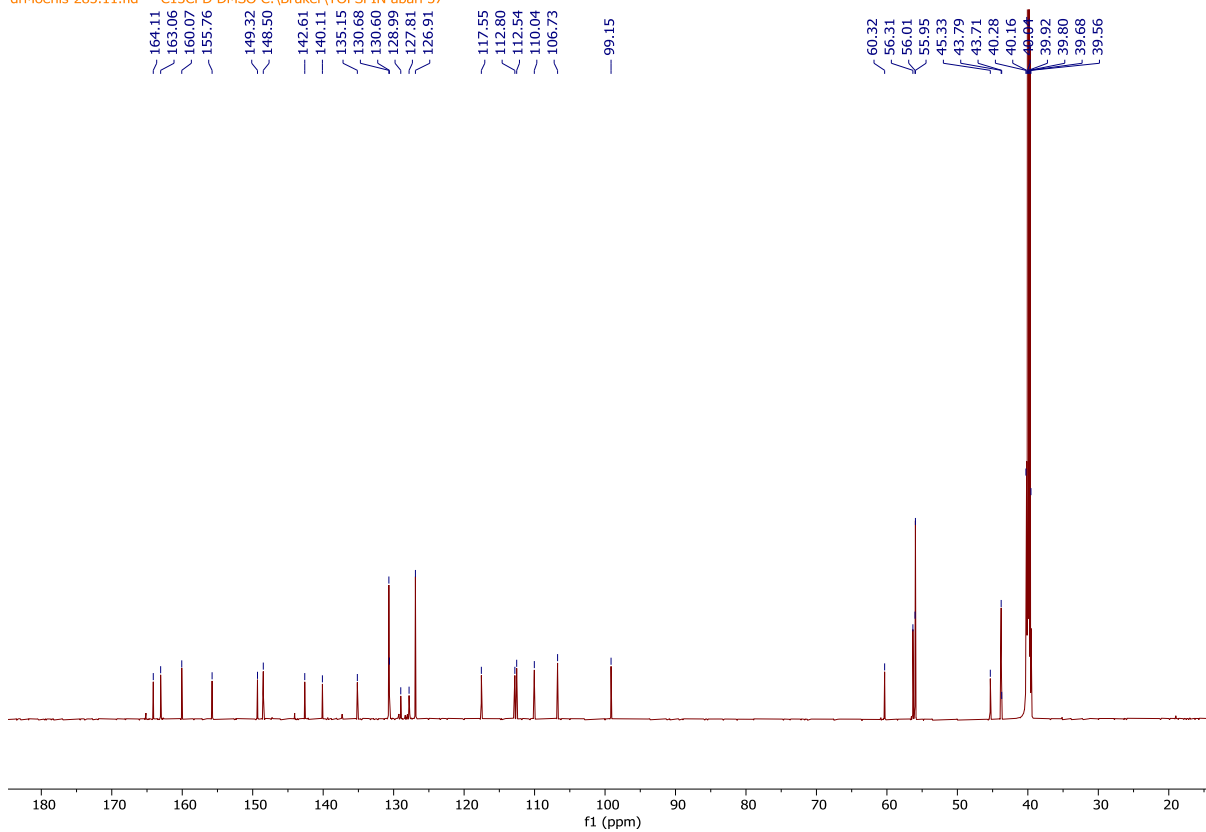

drMoenis-MS-78.10.fid — PROTON DMSO {C:\Bruker\TOPSPIN} abari 49

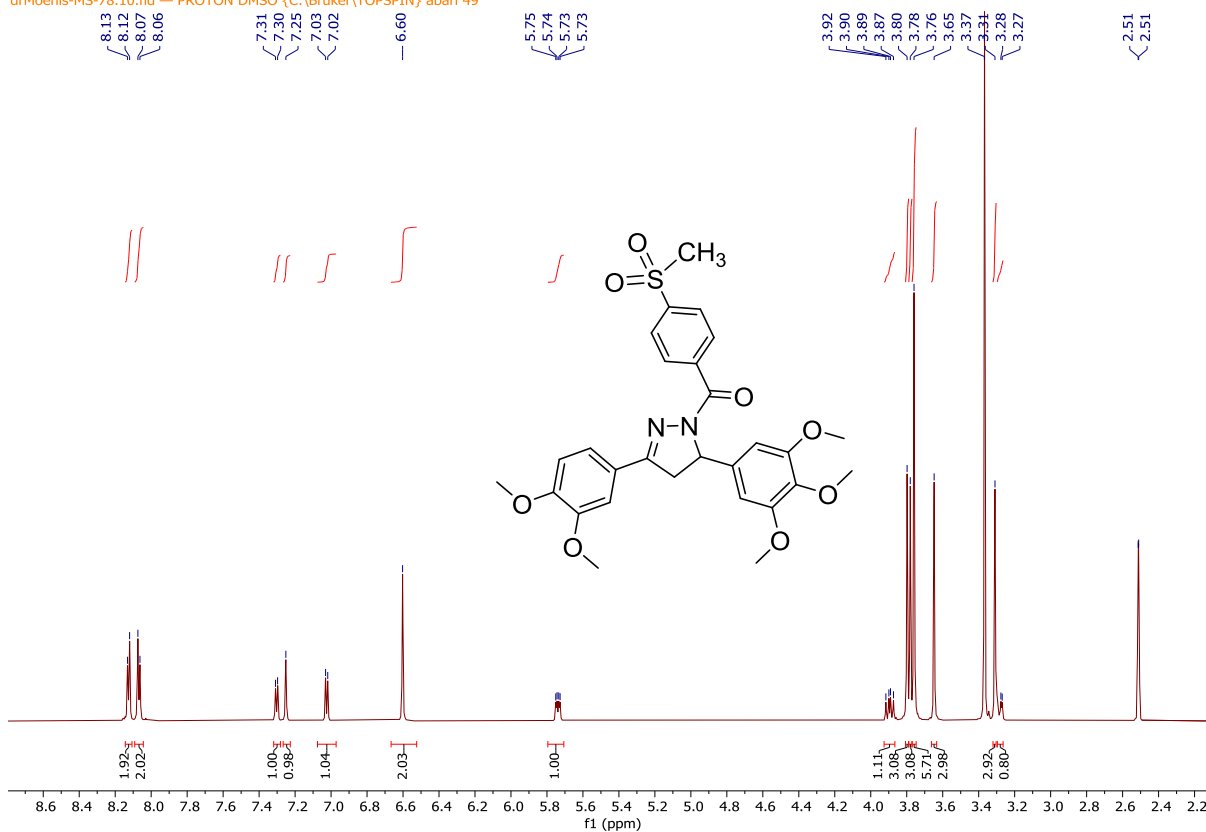

drMoenis-MS-78.11.fid — C13CPD DMSO {C:\Bruker\TOPSPIN} abari 49

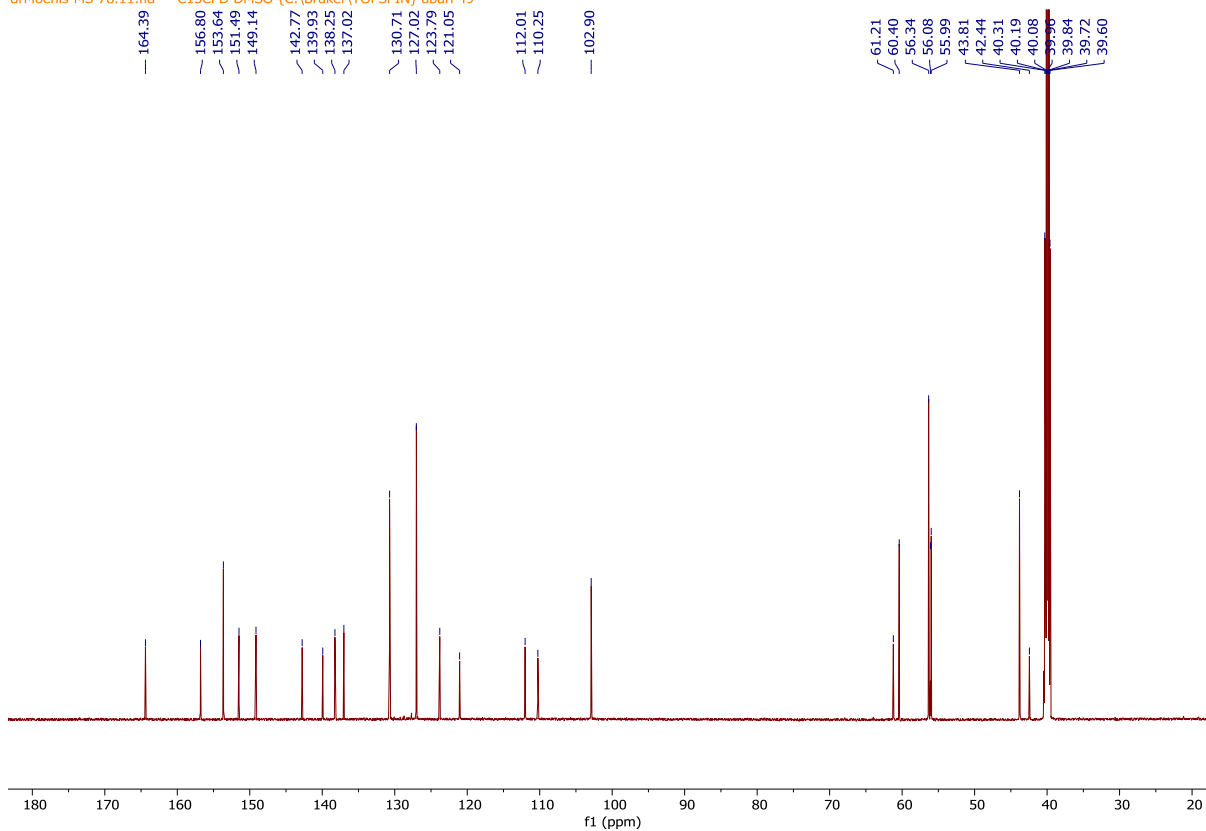

Supplement: d4ra03902e1.pdf [file d4ra03902e1.pdf]
